# Supplementary material for: Density functional simulation of resonant inelastic X-ray scattering experiments in liquids: acetonitrile
Source: Royal Society of Chemistry journal article supplement (doi:10.1039/c6cp03220f), 2016-01-01

## Electronic Supplementary Information

Density functional simulation of resonant inelastic X-ray scattering experiments in liquids: acetonitrile

The quasielastic lineshape at different excitation energies in the two scattering geometries: vertical (V) and horizontal (H). The vertical line shows the zero-loss position position.

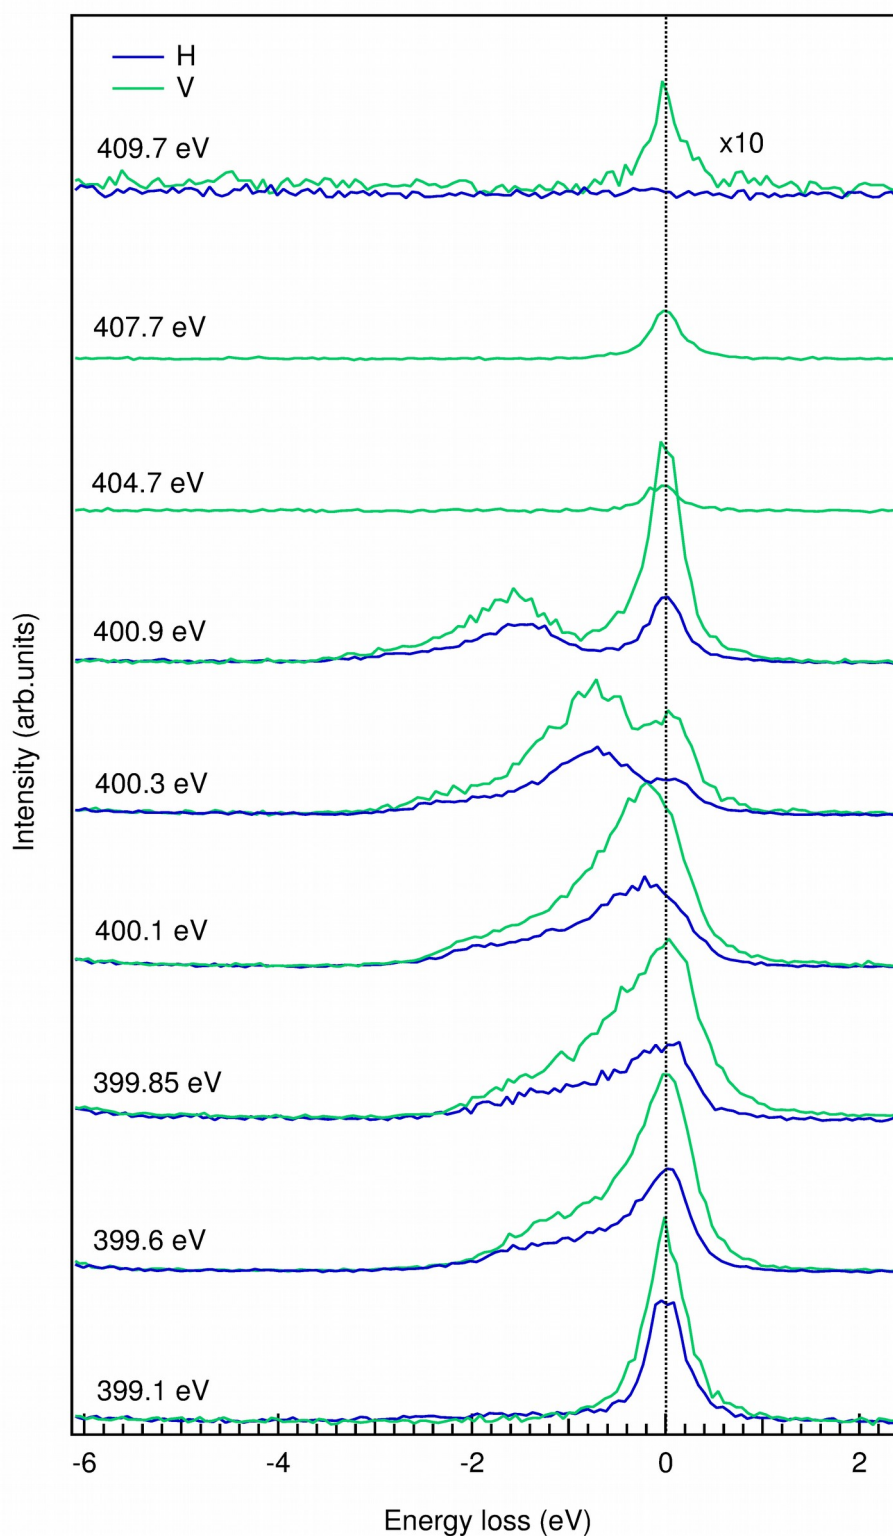

Supplement: c6cp03220f1.pdf [file c6cp03220f1.pdf]
